# Supplementary material
Source: PubMed Central journal article supplement (PMC4389602)
Supplement: rspb20141351supp1.pdf [file rspb20141351supp1.pdf]

## Supporting Information

### 1 Appendix S1

Addition of a single trophic level for a species evolving under climate change reveals a fundamental challenge for ecologists tasked with predicting impacts of climate change, and a challenge for species trying to adapt to a changing climate while being preyed upon. Although our model neglects many processes, it provides a necessary first step in investigating how trophic interactions may affect species ecological and evolutionary responses to climate change and their impacts on ecosystem function. The approach we have developed is promising for future studies.

In particular, both the direct density-mediated effects of the interacting species and the density-driven rate of adaptive trait evolution have impacts on responses to climate change. Species interactions not only can create different outcomes in a constant environment, and hence different initial conditions in a changing environment, but also can create different targets in a changing environment. Thus, they can increase the number of targets and trajectories with climate change so that species may not be evolving to track simply their optimal temperature or thermal niche.

We challenge a recent prediction that predators should aid the adaptation of their prey (Jones, 2008). Although we do not include the potential mechanism of culling of maladapted individuals (Jones, 2008), we do explicitly include strength and direction of selection, and importantly, biomass. The large reduction in biomass of the plant species when the herbivore species is present, has a strong impact on the ability of the plant to adapt to a warming environment.

22 We focused on the following questions in our study: 1) How does the addition of a  
23 herbivore affect the ecological and evolutionary attractors in a static environment?, 2) How does  
24 the herbivore affect the ability of the plant to adapt to and persist in a changing environment?, and  
25 3) How do the evolutionary attractors, relative thermal niche widths, and rates of environmental  
26 and evolutionary change determine ecosystem responses to warming?

27 We found the addition of the trophic interaction has a strong negative effect on density and  
28 rate of adaptation of the plant. The trophic interaction can create different coevolutionary  
29 attractors in a static environment. These attractors are determined by thermal niche widths and  
30 create different targets and trajectories in a changing environment. Thermal niche width, coupled  
31 with trophic interactions, can either increase or decrease plant and herbivore persistence,  
32 depending on the underlying strategy. Shortest persistence times occur at intermediate thermal  
33 niche width of the plant, whether herbivores are present or not.

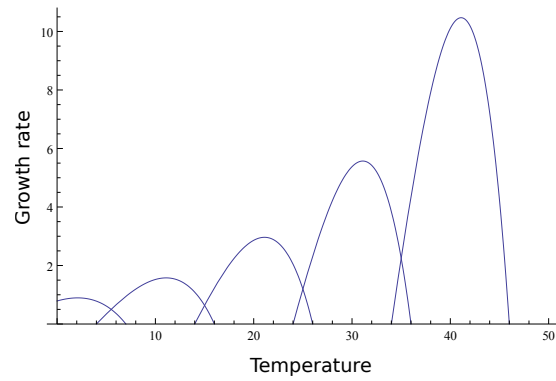

Figure 1: Growth versus temperature curves for species with different thermal optima. The maximum growth rate increases exponentially due to the empirically derived relationship described by Eppley (1972).

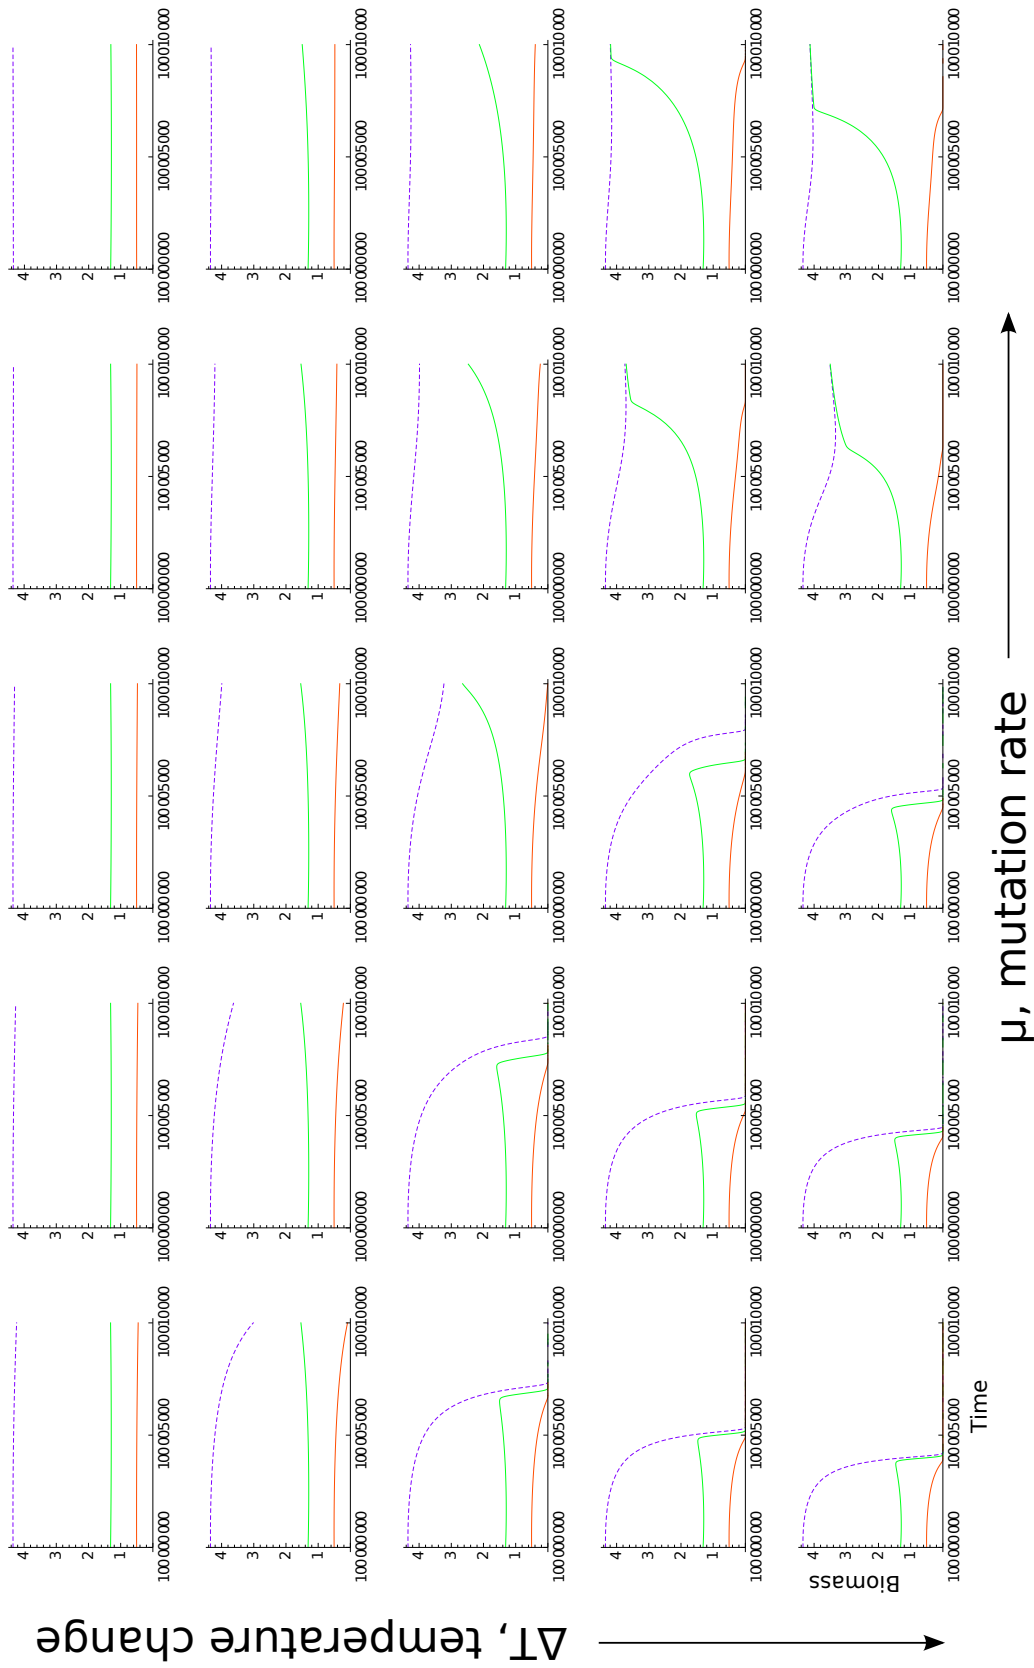

Figure 2: Herbivore biomass (red) and plant biomass with  $H$  (green) and without  $H$  (dashed purple) through time in a warming environment. Each plot is arrayed across mutation rate and amount of temperature change in the  $t = 10^4$  interval of time. For low temperature change and high mutation rate (upper right corner), biomass for both species is relatively constant. For high temperature change and low mutation rate (lower left corner), biomass eventually declines for both species resulting in extinction. Parameters are:  $\sigma = 3$ ,  $w_P = 4$ ,  $w_H = 8$  and the array values for  $\mu$  are  $10^{-4}$ ,  $10^{-3.75}$ ,  $10^{-3.5}$ ,  $10^{-3.25}$ ,  $10^{-3}$  in steps of one order of magnitude and  $\Delta T$  values are 1, 2, 3, 4, 5.

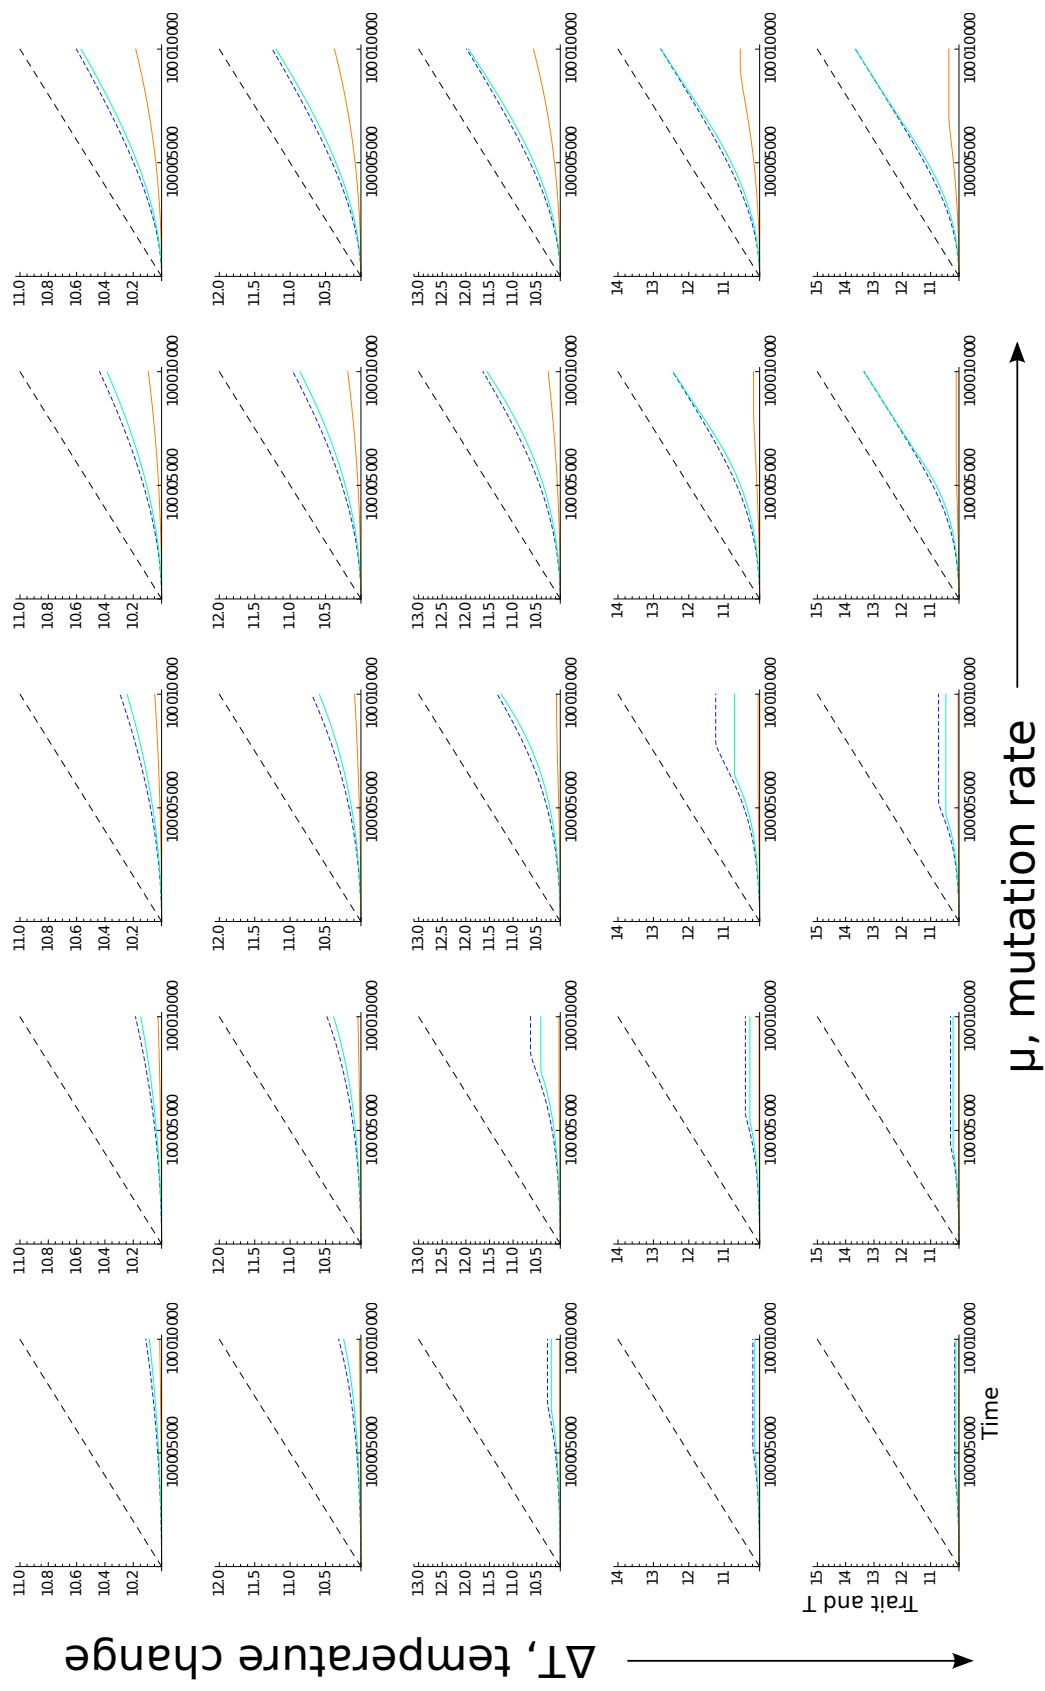

Figure 3: Same as Appendix S1 Figure 2 except for thermal trait and temperature values through time. Black dashed line is temperature, orange is Herbivore trait, light blue is plant trait with  $H$ , and dashed dark blue is plant trait without  $H$ . For low temperature change and high mutation rate (upper right corner), thermal traits match the moving optimum. For high temperature change and low mutation rate (lower left corner), thermal traits are not able to track the moving optimum resulting in extinction.

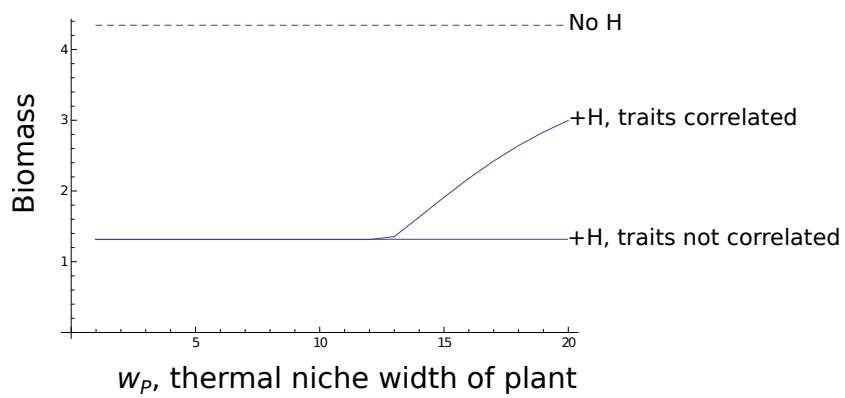

Figure 4: Equilibrium plant biomass versus plant thermal niche width  $w_p$  for without the herbivore (dashed line) and with the herbivore (solid lines) for when traits are correlated and not correlated. Parameters are:  $\sigma = 3, w_H = 8$ .

## 2 Evolutionary analysis methods

### 2.1 Adaptive trait evolution

We borrow many of the tools of adaptive dynamics (Dieckmann & Law, 1996; Geritz *et al.*, 1998) to analyze trait evolution.

We define the fitness,  $W_{P_{inv}}$ , of an invading phenotype of the plant species with traits  $s_{P_{inv}}$  and  $z_{P_{inv}}$

$$W_{P_{inv}}(s_{P_{inv}}, s_P, z_{P_{inv}}, z_P, s_H, z_H) = \frac{1}{P_{inv}} \frac{dP_{inv}}{dt} \quad (1)$$

Similarly we define the fitness of an invading phenotype of the herbivore species,  $W_{H_{inv}}$  with trait  $s_{H_{inv}}$  and  $z_{H_{inv}}$

$$W_{H_{inv}}(s_{H_{inv}}, s_P, s_H, z_{H_{inv}}, z_H) = \frac{1}{H_{inv}} \frac{dH_{inv}}{dt} \quad (2)$$

and evaluate both fitness equations with the equilibrium environment set by the resident species  $P$  and  $H$  (refer to the equilibrium above). Hereafter we use the following subscript notation to describe: the  $j = P$  plant species and  $j = H$  for the herbivore species evolutionary equations involving derivatives of the fitness equations.

#### 2.1.1 Finding the singular strategies

Our goal was to find the evolutionary endpoints for a given static environment and the trajectories in a changing environment. We performed evolutionary simulations. For each simulation, we numerically solved the seven-dimensional system consisting of the three equations for the quantities of the resource, plant, and herbivore (Equations 1, 2, 3) and one equation for each of the trait values of the plants and herbivores (Equation 6). In the evolutionary simulations with

52 Equation 6, we tested at least two sets of initial conditions and let the traits evolve until no further  
53 change was observed.

54         Following the assumptions of adaptive dynamics, we effectively have a separation of time  
55 scales between population dynamics and trait dynamics because we assume a small mutation rate  
56 ( $\mu = 10^{-3.5}$ ) for most of our results. We could relax this assumption by increasing mutations  $\mu$   
57 (Abrams, 2001) to no longer have a separation of ecological and evolutionary time scales, which  
58 may be important given recent studies on rapid evolution (Abrams, 2003). Interestingly, this  
59 generalized approach usually leads to the same results (Abrams, 2005). Furthermore, although we  
60 model mutation limited evolution (Marrow *et al.*, 1996), one may consider  $\mu$  to include other  
61 mechanisms that scale evolutionary rates (Dieckmann & Law, 1996). For example, mutation  
62 variance (we assume constant) (Dieckmann & Law, 1996), additive genetic variance (Abrams  
63 *et al.*, 1993), or phenotypic variance (Lande, 1976) is also often included in this term (Abrams,  
64 2001), and are also related to population size (Frankham, 1996). Other mechanisms such as  
65 heritability (Lande, 1976; Abrams *et al.*, 1993) may be independent of population size, while the  
66 assumption of the resident population quickly replaced by a mutant with higher fitness may be  
67 opposed by population size. However, we generally assume a small mutation rate and expect  
68 there to be adequate time for the mutation to sweep through the population before the next  
69 mutation occurs.



## 70 **2.2 Classifying the singular strategies**

71 To classify the singular strategies, which we denote as  $s_j^*$  (for  $z_j$  also), we take the second  
 72 derivative of the invader fitness equation with respect to the invader

$$\left. \frac{\partial^2 W_{j_{inv}}}{\partial s_{j_{inv}}^2} \right|_{s_{j_{inv}} \rightarrow s_j \rightarrow s_j^*} \quad \text{for } j = P, H \quad (3)$$

73 and check that Appendix S1 Eqn 3  $< 0$  for  $j = P$  or  $H$ , and therefore the singular strategy is an  
 74 ESS for the plant or herbivore species respectively. To further classify the ESS, we take the  
 75 second derivative of the fitness equation with respect to the resident

$$\left. \frac{\partial^2 W_{j_{inv}}}{\partial s_j^2} \right|_{s_{j_{inv}} \rightarrow s_j \rightarrow s_j^*} \quad \text{for } j = P, H \quad (4)$$

76 to check if it is convergent stable (Appendix S1 Eqn 4 - Appendix S1 Eqn 3  $> 0$  for  $j = P$  or  $H$ )  
 77 and therefore a continuously stable strategy, CSS (Geritz et al.1998) for the plant or herbivore  
 78 species respectively. We determined the signs of the derivatives numerically by first computing  
 79 the derivatives of the symbolic expressions and with the parameter values, evaluating the  
 80 expressions numerically at the ecological and evolutionary steady state as determined by the  
 81 simulations. Through these methods, we found that the singular strategy  $ss$  of the plant species  
 82 can be at a fitness minimum, while the herbivore is always at a CSS under these situations. It is  
 83 possible that with our no separation of ecological and evolutionary timescales assumption, and  
 84 under specific parameter combinations, very rapid evolution may turn these fitness minima into  
 85 branching points (Calcagno *et al.*, 2010) for the plant, although we do not explore this possibility  
 86 here.

## 87 **3 Cases descriptions**

88 We use two limiting assumptions regarding our traits to bracket the spectrum of possible  
89 scenarios: perfectly correlated traits and completely independent traits. For completely  
90 independent traits, the thermally related traits  $z_P, z_H$  always matched the temperature  $T$  of the  
91 environment (Table 1 Trait  $z_P = T$ ) and the traits describing the interaction  $s_P, s_H$  are driven by  
92 sensitivity to initial conditions.

93 For correlated traits, the primary distinction of the cases is based on the trait values, which  
94 separates the equilibria into four cases: a case where the herbivore is extinct (Case H ext), cases  
95 where the traits of both species match the environmental temperature  $T$  (Cases  $T$  Co-ESS and  
96 H-ESS), cases where the traits of both species do not match each other nor  $T$  (Cases not  $T$   
97 Co-ESS and H-ESS), and a case where the traits undergo coevolutionary cycles (Case Evo-Cyc).  
98 The secondary distinction of Co-ESS and H-ESS in Cases  $T$  and not  $T$  is based on the  
99 evolutionary stability of the equilibrium and we found two qualitatively different outcomes in  
100 terms of evolutionary stability: if both species are at an evolutionarily stable strategy (ESS), we  
101 classify the case as a Co-ESS and if just the herbivore is at an ESS, we classify it as an  $H$  ESS,  $P$   
102 fitness minimum.

### 103 **3.1 Assumption 1: Traits correlated**

104 Under this assumption of perfectly correlation,  $s_j = z_j$ . We will refer to the traits as  $s_j$  in notation  
105 while considering this assumption.

#### 106 **Case H ext: $s_P = T$ , $H$ extinct**

107 Therefore  $s_P$  evolves to match  $T$  of the environment.

108 **A.**  $s_H$  too far from  $s_P$  initially.

109 **B.** Lemmings play (plant takes herbivore to boundary and it goes extinct).

110 **Case  $T$ :**  $s_P = s_H = T$

111 Equilibrium for the traits of both species is at  $T$ , a co-ESS or herbivore ESS and plant  
112 fitness minimum.

113 **A.** Co-ESS

114 **B.**  $H$  ESS,  $P$  fitness minimum.

115 **Case not  $T$ :**  $s_P \neq s_H \neq T$

116 Equilibrium above or below  $T$  depending on initial conditions, the relative positions of  $s_P$   
117 and  $s_H$ .

118 **A.** Co-ESS

119 **B.**  $H$  ESS,  $P$  fitness minimum.

120 **Case Evo-Cyc: Coevolutionary cycles**

121 In the cycles, the attractor for the plant is changing between a repellor when  $s_P$  is closer to  
122  $T$  than  $s_H$  and an ESS when further.

### 123 **3.2 Assumption 2: Traits not correlated**

124 For traits not correlated,  $z_P = z_H = T$  always if we assume positive biomass for  $P, H$ . Therefore in  
125 a static environment we focus on  $s_P, s_H$  because the stabilizing selection disappears but the  
126 interaction between the species remains.

127 Possible outcomes:

128 We introduce a quantity  $x$ , the location of the singular strategy to illustrate the sensitivity  
129 of these cases to initial conditions.

130 **Case x H ext:**  $s_P = x$ ,  $H$  extinct

131 where  $x$  depends on initial conditions (the relative positions of  $s_P, s_H$ ) and the extinction  
132 rate of  $H$ .

133 Effectively  $P$  escapes  $H$ .

134 **Case x:**  $s_P = s_H = x$

135 **A.**  $H$  ESS,  $P$  fitness minimum

136 where  $x$  depends on initial conditions (the relative positions of  $s_P, s_H$ ),  $\mu_P, \mu_H, \sigma$ , and  
137 initial values of  $s_P, s_H$ .

138 **B.**  $P$  extinct due to overexploitation.

139 We do not consider this case further.

## 140 **4 Determinants of Cases in a static environment for correlated** 141 **traits**

142 We found that the distinct cases and locations depend on the assumption of correlated or  
143 uncorrelated traits, relative mutation rates of the two species, relative thermal niche widths of the  
144 two species, and the grazing interaction kernel width. The traits not correlated assumption leads  
145 to only the grazing trait for each species that shows responses in a static environment since the  
146 thermal trait will always match the temperature of the environment  $T$ . The grazing trait is a direct  
147 result of the initial conditions, the absolute starting positions of traits. Therefore, we present the  
148 correlated traits assumption.

149 When mutation rates are equal between the plant and herbivore species, increasing grazing  
150 interaction kernel width increases the regions where the traits of both species match the  
151 temperature of the environment  $T$  (Appendix S1 Figure 5). In contrast, increasing the thermal  
152 niche width of the plant  $w_P$ , increases the regions where the traits of both species do not match  
153 the temperature of the environment  $T$  (Trait  $z_P \neq T$  in Table 1 and High  $ss$  and Low  $ss$  in Figure  
154 2a). In addition, there is an interactive effect of plant thermal niche width and grazing interaction  
155 kernel width on the regions of the cases and subcases.

156 With a higher plant mutation rate, the influence of parameters on cases is modified and the  
157 region where evolutionary cycling occurs (Case Evo-Cyc) becomes larger (compare Appendix S1  
158 Figure 5 to Appendix S1 Figure 6).

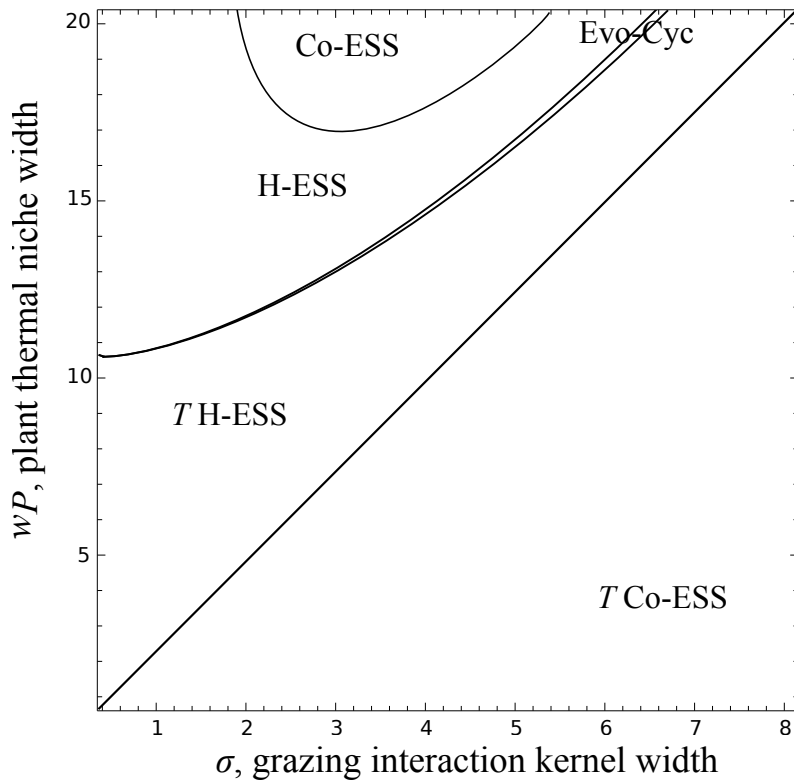

Figure 5: Determinants of Cases and trait values in a static environment for correlated traits. Effect of  $w_P$ , the thermal niche width for  $P$  and  $\sigma$ , the interaction kernel width on evolutionary attractors (Cases) in a static environment with  $\mu_P = \mu_H$ . Cases: H ext :  $s_P = T$ ,  $H$  extinct,  $T$  Co-ESS :  $s_P = s_H = T$ , Co-ESS,  $T$  H-ESS :  $s_P = s_H = T$ ,  $H$  ESS,  $P$  fitness minimum, Co-ESS :  $s_P \neq s_H \neq T$ , Co-ESS, H-ESS :  $s_P \neq s_H \neq T$ ,  $H$  ESS,  $P$  fitness minimum, Evo-Cyc : Coevolutionary cycles. Parameters:  $w_H = 8$ .

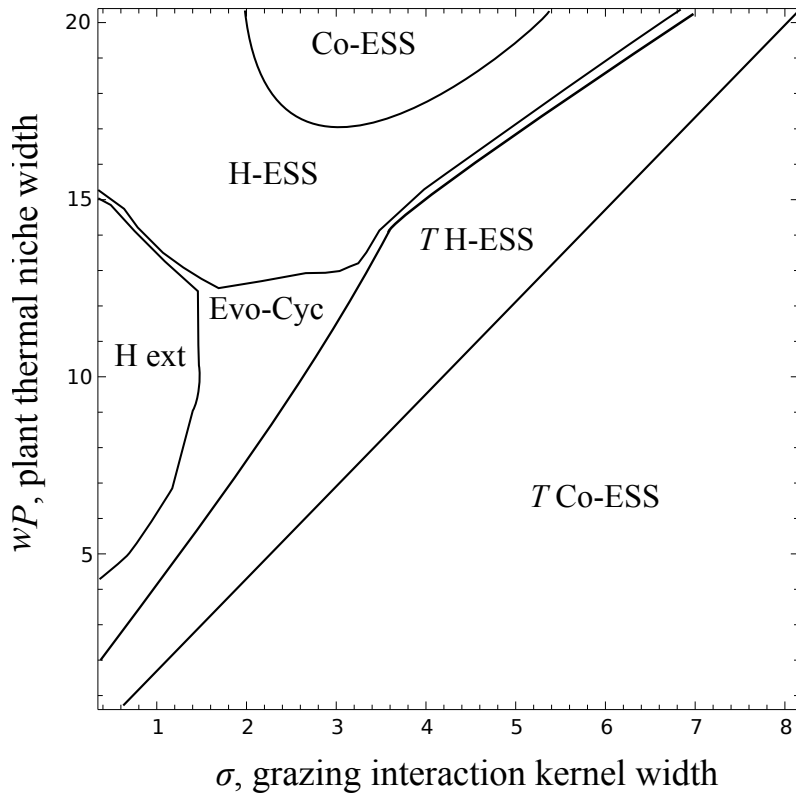

Figure 6: Same as Figure 5 but with  $\mu_P > \mu_H$ . Effect of  $w_P$ , the thermal niche width for  $P$  and  $\sigma$ , the interaction kernel width on evolutionary attractors (Cases) for correlated traits in a static environment. Cases: H ext :  $s_P = T$ ,  $H$  extinct,  $T$  Co-ESS :  $s_P = s_H = T$ , Co-ESS,  $T$  H-ESS :  $s_P = s_H = T$ , H ESS,  $P$  fitness minimum, Co-ESS :  $s_P \neq s_H \neq T$ , Co-ESS, H-ESS :  $s_P \neq s_H \neq T$ , H ESS,  $P$  fitness minimum, Evo-Cyc : Coevolutionary cycles. Parameters:  $w_H = 8$ .

## 5 Functions and parameters in model

Although many biological and ecological processes are temperature dependent, we incorporate temperature dependence in one growth-related parameter for each species to simplify interpretation. In our model, the nutrient uptake rate (Dell *et al.*, 2011) and grazing rate (Rall *et al.*, 2012; Englund *et al.*, 2011) parameters are temperature dependent but ingestion, metabolism, conversion efficiency, production, and mortality could all have temperature dependencies (Vasseur & McCann, 2005). We obtain the same qualitative results when conversion efficiencies for both species are temperature dependent instead.

We follow recent evidence and suggestions and make temperature relationships unimodal in our model (Dell *et al.*, 2011; Englund *et al.*, 2011), rather than a strictly increasing function such as predicted by the Arrhenius equation to model effects of warming on species interactions in food web models (Mitchell & Angilletta Jr., 2009). The maximum rate of our temperature-related parameters scales (increases) with temperature following Eppley (1972); Bissinger *et al.* (2008); Thomas *et al.* (2012) and the thermodynamic constraints hypothesis (Angilletta *et al.*, 2010). This creates a tradeoff along the temperature axis with colder adapted species relatively disadvantaged in maximum growth rate, not a tradeoff of niche width versus maximum growth rate since we do not model the evolution of niche width. Niche width evolution and a tradeoff of width versus maximum growth rate (Ackermann & Doebeli, 2004) could potentially lead to more diverse patterns in persistence time. We do not assume maximum interaction strength or mortality rates to be a constant proportion of the maximum growth/metabolism rate (Edeline *et al.*, 2013). We used realistic thermal niche widths to describe the unimodal temperature dependence for each species (Sunday *et al.*, 2011). Our grazing rate follows a unimodal relationship with traits following previous theoretical studies (Abrams, 2000; Calcagno *et al.*, 2010) and empirical evidence (Rall *et al.*, 2012) but a one-sided interaction was used in the only other study (Jones, 2008) with



183 trophic interactions evolving under extinction-inducing environmental change.

184 Our parameter range for mutation rate ( $\mu = 10^{-5}$  to  $10^{-1}$ ) falls in the previously used  
185 ranges of  $10^{-2} - 10^{-1}$  for  $qV$  (population size scaling factor x genetic variance) (Norberg *et al.*,  
186 2012),  $10^{-2}$  for evolutionary change (Thomas *et al.*, 2012), and  $10^{-7} - 10^{-4}$  per capita per time  
187 mutation rate (Osmond & de Mazancourt, 2012). Our goal was not to match the value of our  
188 mutation rate to an exact value measured empirically on a particular organism, rather to consider  
189 a range of values, due to uncertainty in those evolutionary rates and the many mechanisms that  
190 create them (Shapiro, 2013) as well as rates of future temperature change. Under our assumption  
191 of traits not correlated, we follow a previous study (Loeuille & Leibold, 2008) and split mutations  
192 between the two traits, effectively assuming heritably independent mutations with two separate  
193 loci, leading to slower adaptation. Parameterizing our model with  $t$  timesteps in units of days,  
194 leads to approximately 30 years of temperature change, in which we consider 1-4 degrees of  
195 temperature change during that time. This range of 1-4 degrees of temperature change  
196 (corresponding to about 0.03 to 0.13 degrees change per year) is of the same order of magnitude  
197 as previous studies and current predictions (Norberg *et al.*, 2012; IPCC, 2007). Note that  
198 outcomes strongly depend on mutation rate, a parameter that has more uncertainty.

199 Parameter notation follows Hulot & Loreau (2006) and values for resource supply,  
200 maximum grazing rate, mortality rates, and conversion efficiencies are similar to values used in  
201 (Mellard & Ballantyne IV, 2014; Loeuille *et al.*, 2002; Loeuille & Loreau, 2004) who studied  
202 plant-herbivore coevolution in a constant environment. However, we varied these parameters to  
203 match natural systems. Most lakes have a heterotrophic to autotrophic biomass ratio of less than 1  
204 and if one compares just the algae and macrozooplankton biomass, one obtains values of similar  
205 magnitude (del Giorgio & Gasol, 1995). We use a herbivore to plant biomass ratio of 0.07-0.4.  
206 We also used parameters that led to an inversion of the biomass pyramid, up to 100:1 biomass

207 ratio of herbivore to plant biomass, depending on the strategies in a static environment. Although  
208 rare, this can occur in some very unproductive aquatic planktonic systems. In such situation, the  
209 plant can go extinct before the herbivore, although the herbivore will eventually go extinct  
210 without the plant. We recognize that a model that is substantially different from ours in the  
211 assumptions could lead to different behavior. However, we leave that for future comparisons.

212 We speculate that herbivores that are highly specialized on a plant species should have  
213 similar thermal optima as the plant species and may also be thermal specialists. If so, then given  
214 our results, specialists will start tracking the temperature change sooner than generalist herbivores  
215 whom may become more decoupled in their interaction with certain plant species. Although  
216 generalists benefit from the insurance multiple species provide, contrary to what we may expect,  
217 they may experience lower persistence because they eventually lag too far behind the changing  
218 climate. We already observe generalist forest plant species to be lagging more than specialists  
219 (Bertrand *et al.*, 2011).

220 Although we are not aware of many studies (Jones, 2008; Moya-Laraño *et al.*, 2012;  
221 Northfield & Ives, 2013) that have considered trophic interactions in the context of coevolutionary  
222 response to environmental change, competition has been shown to help or hinder evolutionary  
223 rescue depending on certain conditions (Osmond & de Mazancourt, 2012). Studies on  
224 evolutionary rescue typically consider a small, abrupt environmental shift, and derive an  
225 analytical expression for the rate of trait change to the new optimum. We however, find out under  
226 what conditions all populations can catch a constantly moving optimum.

227 In addition to steadily increasing temperature (Way & Oren, 2010), abrupt climatic events  
228 may affect herbivores very rapidly and shift the ecosystem state (Kurz *et al.*, 2008; Raffa *et al.*,  
229 2008) as well as directly affect plants Charru *et al.* (2010) so it would be interesting to combine  
230 these effects in a model along with other possible climate effects. For example, a climate-induced

231 trophic cascade can happen due to size changes rather than extinction of species (Jochum *et al.*,  
232 2012). Higher trophic levels also lead to more changes in the rest of the community if removed  
233 (Zarnetske *et al.*, 2012). However, even with these complexities, patterns in biotic interactions  
234 have emerged repeatedly in the past, patterns which may be used to bolster our predictions for the  
235 future (Blois *et al.*, 2013).

Table 1: Parameter values unless noted otherwise.

| Variable or Parameter [Dimension]                  | Definition                                                | Value (Range)               |
|----------------------------------------------------|-----------------------------------------------------------|-----------------------------|
| $R$ [Quantity of nutrient]                         | inorganic nutrient quantity                               | state variable              |
| $P$ [Quantity of biomass]                          | plant species biomass                                     | state variable              |
| $H$ [Quantity of biomass]                          | herbivore species biomass                                 | state variable              |
| $z_P$ [Dimensionless]                              | plant thermal trait                                       | evolves                     |
| $z_H$ [Dimensionless]                              | herbivore thermal trait                                   | evolves                     |
| $s_P$ [Dimensionless]                              | plant grazing interaction trait                           | evolves                     |
| $s_H$ [Dimensionless]                              | herbivore grazing interaction trait                       | evolves                     |
| $I$ [nutrient (time) $^{-1}$ ]                     | inorganic nutrient input                                  | 0.5 (0.5-5)                 |
| $q$ [time $^{-1}$ ]                                | inorganic nutrient loss rate                              | 1                           |
| $k$ [(producer biomass x time) $^{-1}$ ]           | per unit biomass uptake rate                              | function of $s_P$           |
| $l$ [producer biomass (nutrient) $^{-1}$ ]         | conversion of nutrients into plants                       | 1                           |
| $m$ [time $^{-1}$ ]                                | loss rate of plant biomass                                | 0.1                         |
| $a$ [(consumer biomass x time) $^{-1}$ ]           | per unit biomass consumption rate of herbivores on plants | function of $s_P, s_H, z_H$ |
| $b$ [consumer biomass (producer biomass) $^{-1}$ ] | conversion of plants into herbivores                      | 1                           |
| $d$ [time $^{-1}$ ]                                | loss rate of herbivore biomass                            | 0.4 (0.1-0.4)               |
| $w_P$ [temperature]                                | plant thermal niche width                                 | 1-30                        |
| $w_H$ [temperature]                                | herbivore thermal niche width                             | 8-12                        |
| $\sigma$ [Dimensionless]                           | interaction kernel width                                  | 0.1-8                       |
| $a_{max}$ [Dimensionless]                          | maximum grazing rate                                      | 0.2 (0.2-0.5)               |
| $\alpha_j$ [Dimensionless]                         | Eppley curve coefficient for species $j$                  | 0.81                        |
| $\beta_j$ [Dimensionless]                          | Eppley curve exponent for species $j$                     | 0.0631                      |
| $\mu_{P,H}$ [biomass $^{-1}$ ]                     | per unit biomass mutation size                            | $10^{-5} - 10^{-1}$         |
| $\Delta T$ [temperature]                           | amount of temperature change [C]                          | 0-10                        |

## 236 **6 Ecological Equilibrium**

237 For our analysis, let  $\hat{R}, \hat{P}, \hat{H}$  represent equilibrium quantities of resource, plants, and herbivores  
238 respectively so that,

$$\hat{R} = \frac{Iab}{qab + dk}, \quad (5)$$

$$\hat{P} = \frac{d}{ab}, \quad (6)$$

$$\hat{H} = \frac{Iabkl - qabm - dkm}{a(qab + dk)}, \quad (7)$$

239 is the equilibrium with the plant and the herbivore present. The existence of this interior  
240 equilibrium with  $\hat{H} > 0$  is possible when  $I > \frac{dm}{bal} + \frac{mq}{kl}$ .

241 The equilibrium without the herbivore is

$$\hat{R} = \frac{m}{kl}, \quad (8)$$

$$\hat{P} = \frac{Ikl - qm}{km}. \quad (9)$$

## 242 **7 Shift from equilibrium under warming**

243 We compare the adaptation of the plant with and without the herbivore to see under what  
244 conditions the herbivore can help adaptation of the plant to a warming environment. We use  
245 analytical methods to examine how the addition of a herbivore to the system affects the ecological  
246 equilibrium and the different eco-evolutionary pathways it acts through such as the direction of  
247 selection, strength of selection, rate of adaptation, and evolutionary endpoints.

248 In general, the addition of a herbivore can affect the plant adaptation through the  
249 following mechanisms:

250 **0) Abundance**

251 **1) Direction of selection** First set of criteria

252 **2) Strength of selection** Second set of criteria

253 **3) Abundance relative to selection** Third set of criteria

254 **4) Starting location** (can be  $\neq T$ , the temperature of the environment)

255 The criteria listed next to the mechanisms follow Osmond and de Mazancourt (2012)  
256 reasoning. All must be met for the addition of the interacting species (herbivore) to help  
257 adaptation of the focal species (plant).

## 258 **7.1 Adaptation without the herbivore**

259 We consider the evolutionary equation for rate of trait change for the plant,  $\frac{dz}{dt} = \mu P \frac{\partial W}{\partial z}$ . At  
260 equilibrium, we can treat  $R$  and  $P$  as constant. Without the herbivore in the system, the fitness  
261 gradient is then  $\frac{dW}{dz_P} = lR \left( \frac{\partial k}{\partial z_P} \right)$ . Therefore, our equation for rate of trait change becomes

$$\frac{dz}{dt} = \mu \hat{P}_{noH} l \hat{R}_{noH} \frac{\partial k}{\partial z_P} \quad (10)$$

262 with  $\hat{P}_{noH}$  and  $\hat{R}_{noH}$  defined in Appendix S1 Equations 8 and 9.

## 263 **7.2 Adaptation with the herbivore**

### 264 **7.2.1 Traits not correlated**

265 Now we consider the situation with the herbivore in the ecosystem and traits not correlated. We  
266 only have to consider the thermal trait  $z$  because only it relates to adaptation to temperature  
267 change. This also means that the herbivore affects plant adaptation only through density effects so  
268 we only have to consider one mechanism, Abundance. We modify Appendix S1 Equation 10 with  
269 the following notation:

$$\frac{dz}{dt} = \mu \hat{P}_H l \hat{R}_H \frac{\partial k}{\partial z_P} \quad (11)$$

270 with  $\hat{P}_H$  and  $\hat{R}_H$  defined in Appendix S1 Equations 5 and 6.

271 We know in general that  $\hat{P}_{noH} > \hat{P}_H$  but also that  $\hat{R}_{noH} < \hat{R}_H$ . For the herbivore to never  
272 help the plant adapt when traits are not correlated, we have to show that  $\hat{P}_{noH} \hat{R}_{noH} > \hat{P}_H \hat{R}_H$ . We  
273 are not aware that this relationship has been shown before so are uncertain if it is always true.  
274 However, we can see it is always true for the parameter values we explored in our model.

275 Furthermore, by imposing our system constraint in the form of the feasibility criteria for  $H$ ,  
 276  $I \geq \frac{dm}{bal} + \frac{mq}{kl}$ , we can show analytically that for (+) parameter values, as long as  $qab < 1$ , the  
 277 herbivore never helps the plant adapt.

## 278 7.2.2 Traits correlated

279 For correlated traits, we have more complicated expressions and we see other possibilities for the  
 280 herbivore to help the plant adapt, specifically by increasing the strength of selection in the  
 281 direction of environmental change.

282 The fitness gradient for the plant with correlated traits ( $s_P = z_P$  and  $s_H = z_H$ ) is:

$$\frac{dW}{dz_P} = IR \left( \frac{\partial k}{\partial z_P} \right) - H \left( \frac{\partial a}{\partial z_P} \right). \quad (12)$$

283 To satisfy the first set of criteria, Direction of selection,

$$\left( \frac{\partial}{\partial z} \right) k \quad \text{and} \quad \left( \frac{\partial}{\partial z} \right) a \quad (13)$$

284 must be of the same sign to have the grazing select in the same direction as the  
 285 environment for the plant.

286 To satisfy the second set of criteria, Strength of selection,

$$\left| \left( \frac{\partial}{\partial z} \right) (k - a) \right| > \left| \left( \frac{\partial}{\partial z} \right) k \right| \quad (14)$$

287 must be true for grazing to increase the strength of selection. This will always will be true  
 288 if  $\frac{\partial k}{\partial z}$  and  $\frac{\partial a}{\partial z}$  are of different signs.

289 To satisfy the third set of criteria, Abundance relative to selection, we have to compare the  
 290 grazing effect on abundance relative to selection. Thus we will have grazing increasing the rate of



291 adaptation iff

$$\hat{P}_H \left| l \hat{R}_H \left( \frac{\partial}{\partial z} \right) k - \hat{H} \left( \frac{\partial}{\partial z} \right) a \right| > \hat{P}_{noH} \hat{R}_{noH} \left| \left( \frac{\partial}{\partial z} \right) k \right|, \quad (15)$$

292 where  $\hat{H} > 0$ .

293 If  $T > z_H > z_P$ , the herbivore will slow evolution down. When grazing selects in the  
294 opposite direction as the environment and has a stronger selective effect,  $\left| \frac{\partial a}{\partial z} \right| > \left| \frac{\partial l}{\partial z} \right|$ , it reverses  
295 direction of selection and the population evolves away from T. However, satisfying the first  
296 criteria, if  $T > z_P > z_H$ , the herbivore could potentially speed up evolution.

297 These analyses show what must happen for the herbivore to help the plant adapt from its  
298 equilibrium when first departing from a static environment. Once the environment changes  
299 sufficiently, transient dynamics can make these criteria less stringent. When the environment has  
300 changed sufficiently, the equilibrium population equations are no longer valid so the third criteria  
301 cannot be evaluated. Traits can switch relative positions so the first criteria may not be valid, the  
302 second criteria also. We never find the herbivore to aid the adaptation of the plant when we  
303 parameterize our model with realistic values, the exception being that we find the herbivore to  
304 help when it creates a head-start for the plant through coevolution in a static environment,  
305 therefore acting through the fourth mechanism, Starting location.

## 306 8 Conclusions

307 Trophic interactions create different responses of the thermal traits and biomass of species to a  
308 warming climate and, in general, have a negative impact on persistence of species. Species  
309 thermal traits do not always match the environmental temperature and as the environmental  
310 temperature changes, may track an evolutionary attractor some distance from it. Although the

311 trophic interaction acts through a number of mechanisms in our model, amount of biomass  
312 strongly affects species persistence. In addition, we show that the dynamics, persistence, and  
313 biomass can be contingent on the evolutionary endpoint (attractor) in a constant environment. The  
314 amount of biomass and evolutionary endpoint in a static environment and adaptation in a  
315 changing environment are strongly influenced by a key parameter in our model, the thermal niche  
316 width, regularly measured in empirical studies. Future studies should identify for particular  
317 ecosystems, the thermal niche widths of both plants and their herbivores, in order to increase the  
318 predictive ability of modeling in the context of climate change that includes species interactions.

## References

- 319  
320 Abrams, P.A. (2000). The evolution of predator-prey interactions: theory and practice. *Annual*  
321 *Review of Ecology and Systematics*, 31, 79–105.
- 322 Abrams, P.A. (2001). Modelling the adaptive dynamics of traits involved in inter- and  
323 intraspecific interactions: an assessment of three methods. *Ecology Letters*, 4, 166–175.
- 324 Abrams, P.A. (2003). Can adaptive evolution or behaviour lead to diversification of traits  
325 determining a trade-off between foraging gain and predation risk? *Evolutionary Ecology*  
326 *Research*, 5, 653–670.
- 327 Abrams, P.A. (2005). 'adaptive dynamics' vs. 'adaptive dynamics'. *Journal of Evolutionary*  
328 *Biology*, 18, 1162–1165.
- 329 Abrams, P.A., Matsuda, H. & Harada, Y. (1993). Evolutionary unstable fitness maxima and stable  
330 fitness minima of continuous traits. *Evolutionary Ecology*, 7, 465–487.
- 331 Ackermann, M. & Doebeli, M. (2004). Evolution of niche width and adaptive diversification.  
332 *Evolution*, 58, 2599–2612.
- 333 Angilletta, M., Huey, R.B. & Frazier, M. (2010). Thermodynamic effects on organismal  
334 performance: is hotter better? *Physiological and Biochemical Zoology*, 83, 197–206.
- 335 Bertrand, R., Lenoir, J., Piedallu, C., Riofrio-Dillon, G., de Ruffray, P., Vidal, C., Pierrat, J.C. &  
336 Gegout, J.C. (2011). Changes in plant community composition lag behind climate warming in  
337 lowland forests. *Nature*, 479, 517–520.
- 338 Bissinger, J.E., Montagnes, D., Sharples, J. & Atkinson, D. (2008). Predicting marine  
339 phytoplankton maximum growth rates from temperature: improving on the eppley curve using  
340 quantile regression. *Limnology and Oceanography*, 53, 487–493.
- 341 Blois, J., Zarnetske, P., Fitzpatrick, M. & Finnegan, S. (2013). Climate change and the past,  
342 present, and future of biotic interactions. *Science*, 341, 499–503.
- 343 Calcagno, V., Dubosclard, M. & de Mazancourt, C. (2010). Rapid exploiter-victim coevolution:  
344 the race is not always to the swift. *American Naturalist*, 176, 198–211.
- 345 Charru, M., Seynave, I., Morneau, F. & Bontemps, J.D. (2010). Recent changes in forest  
346 productivity: An analysis of national forest inventory data for common beech (*fagus sylvatica*  
347 l.) in north-eastern france. *Forest Ecology and Management*, 260, 864–874.
- 348 Dell, A., Pawar, S. & Savage, V.M. (2011). Systematic variation in the temperature dependence  
349 of physiological and ecological traits. *Proceedings of the National Academy of Sciences*, 107,  
350 10591–10596.

- 351 Dieckmann, U. & Law, R. (1996). The dynamical theory of coevolution: a derivation from  
352 stochastic ecological processes. *Journal of Mathematical Biology*, 34, 579–612.
- 353 Edeline, E., Lacroix, G., Delire, C., Poulet, N. & Legendre, S. (2013). Ecological emergence of  
354 thermal clines in body size. *Global Change Biology*.
- 355 Englund, G., Ohlund, G., Hein, C. & Diehl, S. (2011). Temperature dependence of the functional  
356 response. *Ecology Letters*, 14, 914–921.
- 357 Eppley, R.W. (1972). Temperature and phytoplankton growth in the sea. *Fishery Bulletin*, 70,  
358 1063–1085.
- 359 Frankham, R. (1996). Relationship of genetic variation to population size in wildlife.  
360 *Conservation Biology*, 10, 1500–1508.
- 361 Geritz, S., Kisdi, E., Meszina, G. & Metz, J. (1998). Evolutionarily singular strategies and the  
362 adaptive growth and branching of the evolutionary tree. *Evolutionary Ecology*, 12, 35–57.
- 363 del Giorgio, P.A. & Gasol, J.M. (1995). Biomass distribution in freshwater plankton  
364 communities. *American Naturalist*, 146, 135–152.
- 365 Hulot, F.D. & Loreau, M. (2006). Nutrient-limited food webs with up to three trophic levels:  
366 Feasibility, stability, assembly rules, and effects of nutrient enrichment. *Theoretical Population*  
367 *Biology*, 69, 48–66.
- 368 IPCC (2007). Climate change 2007: Synthesis report. an assessment of the intergovernmental  
369 panel on climate change. Tech. rep.
- 370 Jochum, M., Schneider, F., Crowe, T., Brose, U. & O’Gorman, E. (2012). Climate-induced  
371 changes in bottom-up and top-down processes independently alter a marine ecosystem.  
372 *Philosophical Transactions of the Royal Society of London Series B-Biological Sciences*, 367,  
373 2962–2970.
- 374 Jones, A. (2008). A theoretical quantitative genetic study of negative ecological interactions and  
375 extinction times in changing environments. *BMC Evolutionary Biology*, 8.
- 376 Kurz, W., Dymond, C., Stinson, G., Rampley, G., Neilson, E., Carroll, A., Ebata, T. & Safranyik,  
377 L. (2008). Mountain pine beetle and forest carbon feedback to climate change. *Nature*, 452.
- 378 Lande, R. (1976). Natural selection and random genetic drift in phenotypic evolution. *Evolution*,  
379 30, 314–334.
- 380 Loeuille, N. & Leibold, M.A. (2008). Ecological consequences of evolution in plant defenses in a  
381 metacommunity. *Theoretical Population Biology*, 74, 34–45.

- 382 Loeuille, N. & Loreau, M. (2004). Nutrient enrichment and food chains: can evolution buffer  
383 top-down control? *Theoretical Population Biology*, 65, 285–298.
- 384 Loeuille, N., Loreau, M. & Ferriere, R. (2002). Consequences of plant-herbivore coevolution on  
385 the dynamics and functioning of ecosystems. *Journal of Theoretical Biology*, 217, 369–381.
- 386 Marrow, P., Dieckmann, U. & Law, R. (1996). Evolutionary dynamics of predator-prey systems:  
387 an ecological perspective. *Journal of Mathematical Biology*, 34, 556–578.
- 388 Mellard, J.P. & Ballantyne IV, F. (2014). Conflict between dynamical and evolutionary stability in  
389 simple ecosystems. *Theoretical Ecology*, 7, 273–288.
- 390 Mitchell, W. & Angilletta Jr., M. (2009). Thermal games: frequency-dependent models of  
391 thermal adaptation. *Functional Ecology*, 23, 510–520.
- 392 Moya-Laraño, J., Verdeny-Vilalta, O., Rowntree, J., Melguizo-Ruiz, N., Montserrat, M. & Laiolo,  
393 P. (2012). 1 climate change and eco-evolutionary dynamics in food webs. *Advances in*  
394 *Ecological Research*, 47, 1.
- 395 Norberg, J., Urban M.C. and Velland, M., Klausmeier, C.A. & Loeuille, N. (2012).  
396 Eco-evolutionary responses of biodiversity to climate change. *Nature Climate Change*, pp. 1–5.
- 397 Northfield, T. & Ives, A. (2013). Coevolution and the effects of climate change on interacting  
398 species. *PLOS Biology*, 11, e1001685.
- 399 Osmond, M. & de Mazancourt, C. (2012). How competition affects evolutionary rescue.  
400 *Philosophical Transactions of the Royal Society of London Series B-Biological Sciences*, 368,  
401 1–13.
- 402 Raffa, K., Aukema, B., Bentz, B., Carrol, A., Hicke, J., Turner, M. & Romme, W. (2008).  
403 Disturbances prone to anthropogenic amplification: the dynamics of bark beetle eruptions.  
404 *BioScience*, 58, 501–517.
- 405 Rall, B., Brose, U., Hartvig, M., Kalinkat, G., Schwarzmuller, F., Vucic-Pestic, O. & Petchey, O.  
406 (2012). Universal temperature and body-mass scaling of feeding rates. *Philosophical*  
407 *Transactions of the Royal Society of London Series B-Biological Sciences*, 367, 2923–2934.
- 408 Shapiro, J.A. (2013). How life changes itself: The read-write (rw) genome. *Physics of Life*  
409 *Reviews*, 10, 287–323.
- 410 Sunday, J., Bates, A. & Dulvy, N. (2011). Global analysis of thermal tolerance and latitude in  
411 ectotherms. *Proceedings of the Royal Society B, Biological Sciences*, 278, 1823–1830.

- 412 Thomas, M., Kremer, C., Klausmeier, C.A. & Litchman, E. (2012). A global pattern of thermal  
413 adaptation in marine phytoplankton. *Science*, 338, 1085–1088.
- 414 Vasseur, D. & McCann, K.S. (2005). A mechanistic approach for modeling  
415 temperature-dependent consumer-resource dynamics. *American Naturalist*, 166, 184–198.
- 416 Way, D. & Oren, R. (2010). Differential responses to changes in growth temperature between  
417 trees from different functional groups and biomes: a review and synthesis of data. *Tree*  
418 *Physiology*, 30, 669–688.
- 419 Zarnetske, P., Skelly, D. & Urban, M. (2012). Biotic multipliers of climate change. *Science*, 336,  
420 1516–1518.
